# Supplementary material
Source: PubMed Central journal article supplement (PMC4171009)
Supplement: mabs-6-1059-s01.pdf [file mabs-6-1059-s01.pdf]

**Supplemental Material to:**

**Sherry L La Porte, Charles Eigenbrot,  
Mark Ultsch, Wei-Hsien Ho, Davide Foletti,  
Alison Forgie, Kevin C Lindquist, David L Shelton,  
Jaume Pons**

**Generation of a high-fidelity antibody against nerve  
growth factor using library scanning mutagenesis and  
validation with structures of the initial and optimized Fab-  
antigen complexes**

**mAbs 2014; 6(4)**

**<http://dx.doi.org/10.4161/mabs.28677>**

**<http://www.landesbioscience.com/journals/mabs/article/28677>**

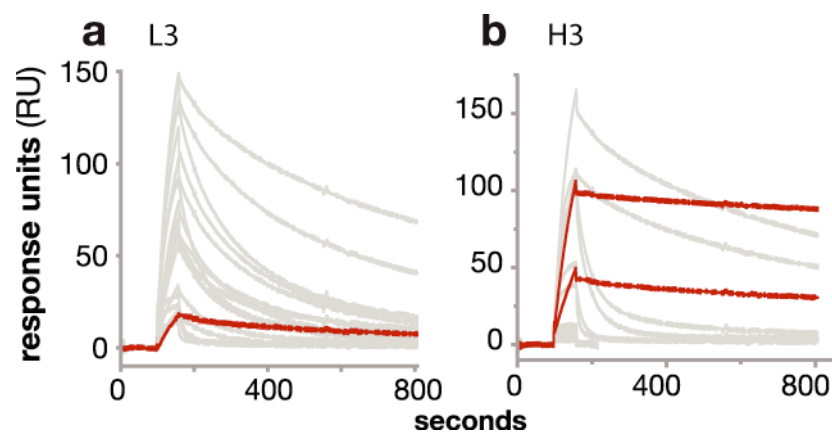

**Figure S1.** Raw biosensor data during LSM off-rate screening. **(a)** L3 mutant biosensor data, where red sensorgram highlights a prolonged off-rate clone **(b)** H3 mutant biosensor data, where red sensorgrams highlight prolonged off-rate clones.

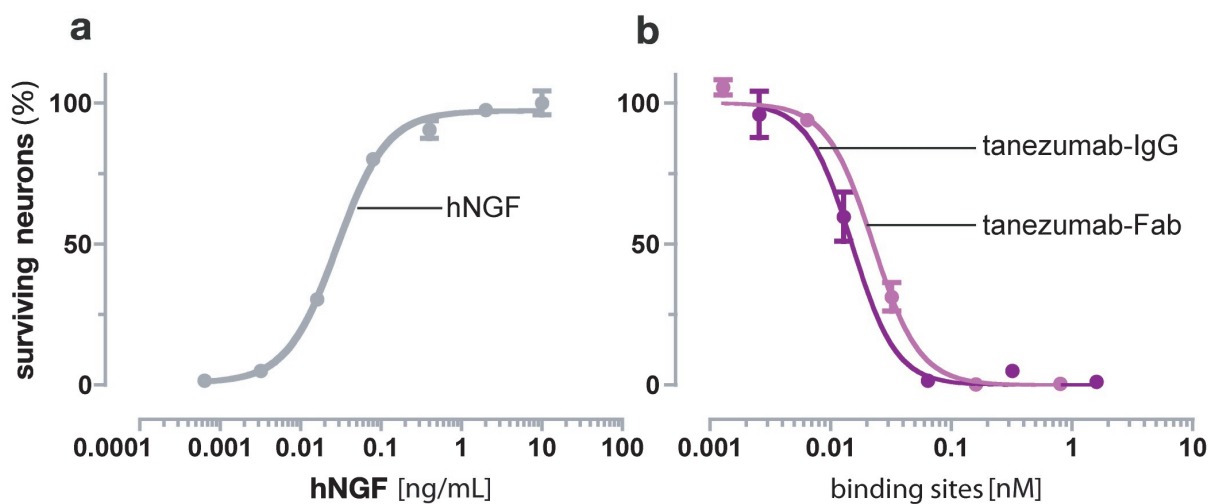

**Figure S2.** Neuron survival assay viability control analysis performed simultaneously with competition assay (**Figure 1e**). **(a)** NGF-dependent survival of embryonic day 13 TG neurons were used to generate NGF dose-response curves corresponding to NGF concentration used in

competition assay. **(b)** Comparison of tanezumab as IgG and Fab to illustrate similarity in activity for bivalent IgG and monovalent Fab with NGF concentration of 15 pM.

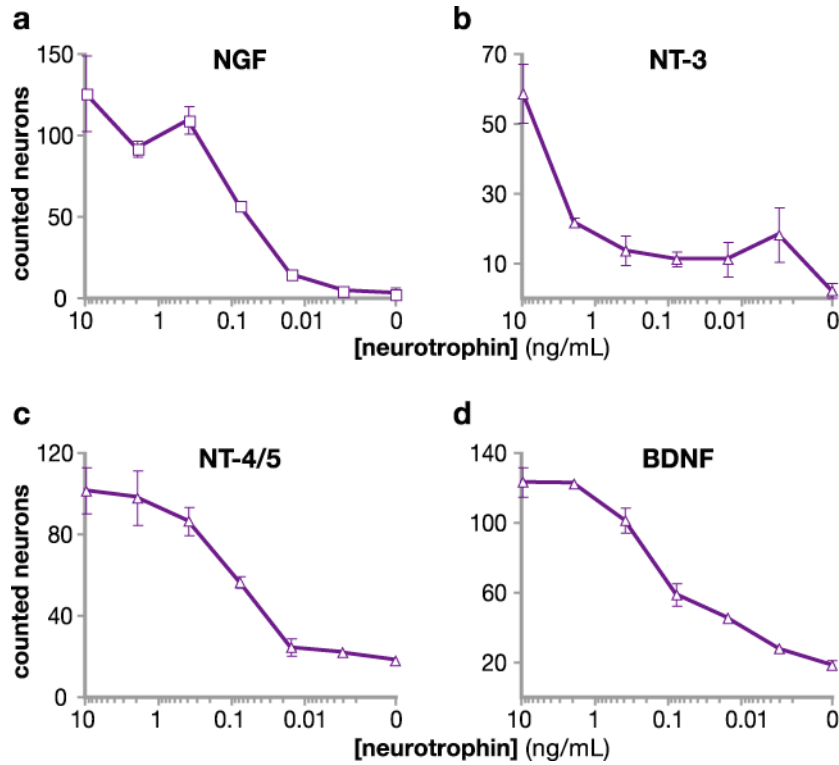

**Figure S3.** TG and Nodose neuron dose-response curves for each neurotrophin used with corresponding Trk-dependent survival and neurotrophin **(Figure 2a-d)**. **(a)** TG neuron survival dependent upon NGF. **(b)** TG neuron survival dependent upon NT-3. **(c)** Nodose neuron survival dependent upon NT-4/5. **(d)** Nodose neuron survival dependent upon BDNF.

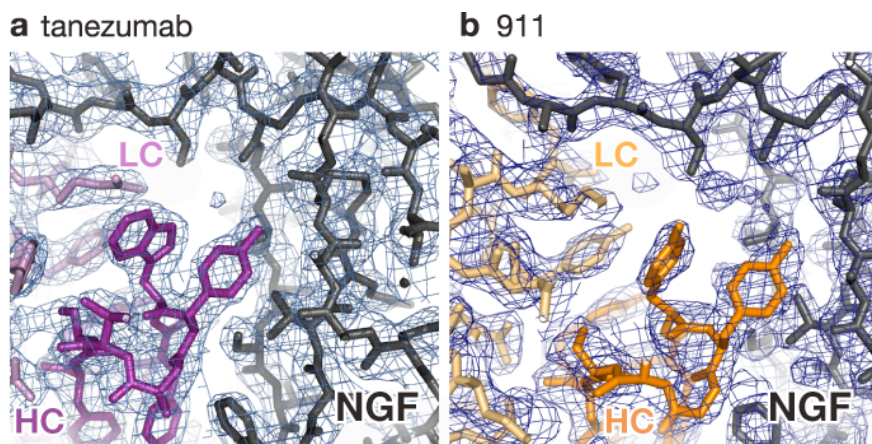

**Figure S4.** Model-phased electron density maps for NGF complexes calculated as 2FoFc contoured at  $1\sigma$ . **(a)** HC CDR3 tanezumab (purple) and NGF (dark gray). **(b)** HC CDR3 911 (orange) and NGF (dark gray).

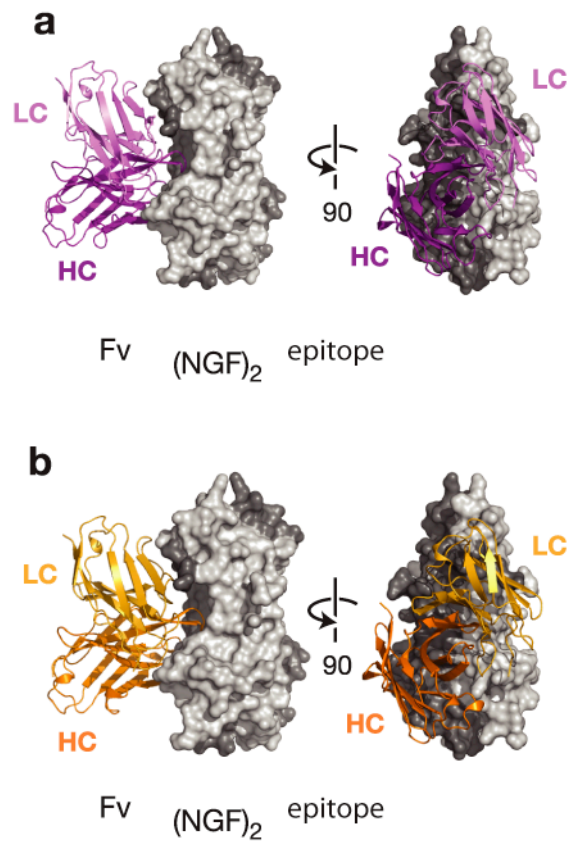

**Figure S5.** Comparison of Fv domains from tanezumab and 911 on (NGF)<sub>2</sub>. Epitope overlap viewed through ribbon diagram representation of tanezumab **(a)** (purple) and 911 **(b)** (orange) as Fv domains on surface diagram of (NGF)<sub>2</sub>(gray).

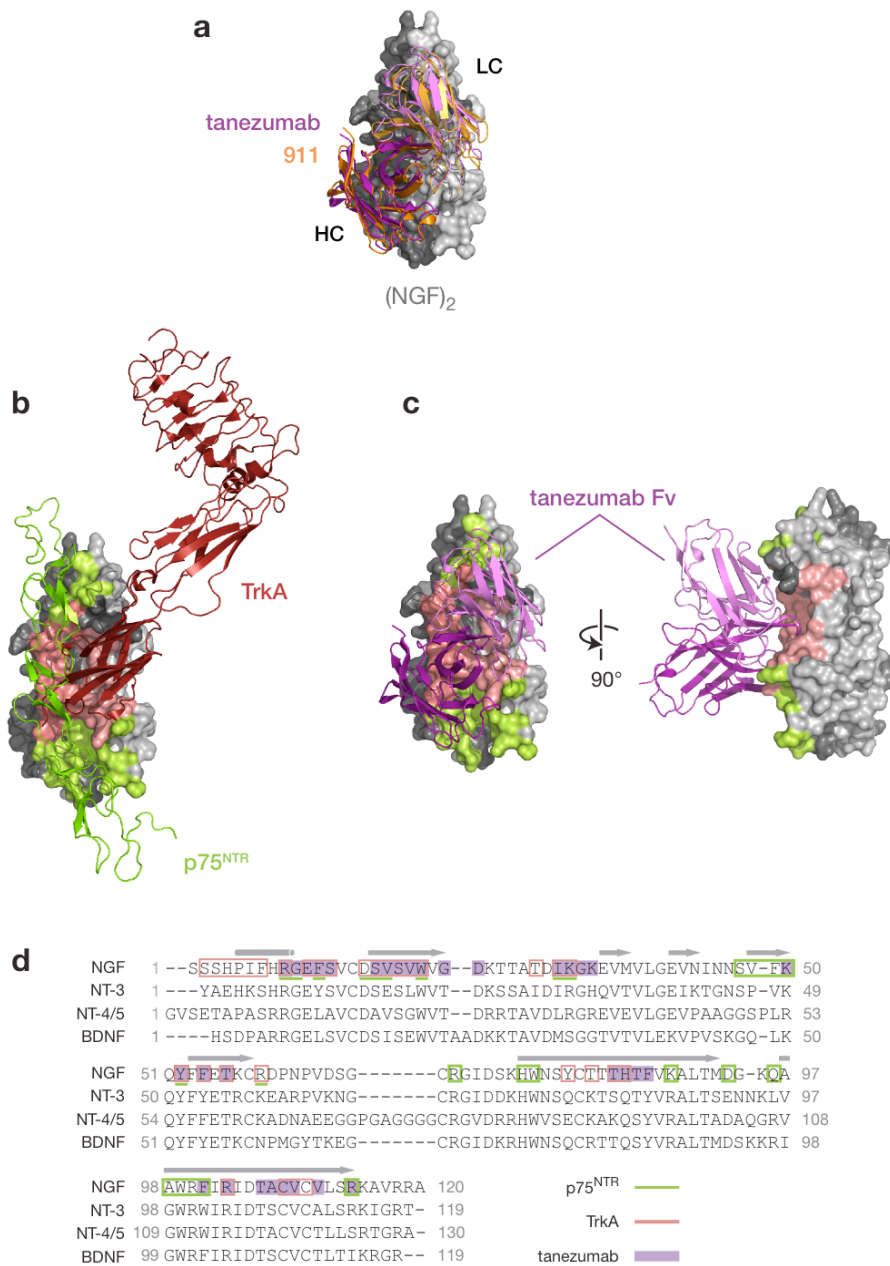

**Figure S6.** Molecular analysis of different complexes visualized after superposing on (NGF)<sub>2</sub> monomer V. **(a)** Epitope overlap viewed through ribbon diagram representation of tanezumab (purple) and 911 (orange) as Fv domains on surface diagram of (NGF)<sub>2</sub>. **(b)** p75<sup>NTR</sup> (green/green), TrkA (red/pink) receptors illustrated as ribbon diagrams over the respective interaction surface on the NGF-dimer. **(c)** tanezumab Fv domain (purple) as ribbon diagrams over

receptor binding surfaces (colored corresponding to receptor binding sites only) for one interface on (NGF)<sub>2</sub>. **(d)** Neurotrophin sequence alignment with receptor binding sites and tanezumab epitope highlighted. NGF secondary structure elements in  $\alpha$ -helix-cylinder and  $\beta$ -sheet arrow schematic are illustrated above the primary amino acid sequence for NGF given in signal amino acid letter code.

**Table S1. Data Collection and Refinement for Fab911/NGF & Fab-tanezumab/NGF**

|                                          | <b>Fab-911/NGF</b>                                                                                       | <b>Fab-tanezumab/NGF</b>                           |
|------------------------------------------|----------------------------------------------------------------------------------------------------------|----------------------------------------------------|
| <b><u>Data collection</u></b>            | SSRL 11-1                                                                                                | ALS 5.0.2                                          |
| space group                              | P1                                                                                                       | C222 <sub>1</sub>                                  |
| cell parameters (Å, °)                   | <i>a</i> =57.75, <i>b</i> =69.93, <i>c</i> =83.74<br><i>α</i> =104.34, <i>β</i> =94.13, <i>γ</i> =110.42 | <i>a</i> =64.70, <i>b</i> =92.71, <i>c</i> =252.73 |
| V <sub>M</sub> (Å <sup>3</sup> /Dalton)  | 3.6                                                                                                      | 4.4                                                |
| Resolution (Å)                           | 50–2.5 (2.59–2.50)                                                                                       | 50–2.5 (2.59–2.50)                                 |
| R <sub>sym</sub> <sup>a,b</sup>          | 0.067 (0.274)                                                                                            | 0.062 (0.270)                                      |
| Number of observations                   | 95822                                                                                                    | 170755                                             |
| Unique reflections                       | 38098                                                                                                    | 25872                                              |
| Completeness (%) <sup>b</sup>            | 96.0 (96.9)                                                                                              | 95.2 (71.9)                                        |
| I/σI <sup>b</sup>                        | 13 (2.6)                                                                                                 | 24 (4.4)                                           |
| <b><u>Refinement</u></b>                 |                                                                                                          |                                                    |
| Resolution (Å)                           | 50 – 2.5                                                                                                 | 50 – 2.5                                           |
| Number of reflections                    | 37866                                                                                                    | 24244                                              |
| Final R <sup>c</sup> , R <sub>FREE</sub> | 0.208, 0.258                                                                                             | 0.207, 0.265                                       |
| Number of residues                       | 1063                                                                                                     | 536                                                |
| Number solvent molecules                 | 98                                                                                                       | 37                                                 |
| Number of atoms <sup>d</sup>             | 8298 (3)                                                                                                 | 4178 (10)                                          |
| Mean B-factor (Å <sup>2</sup> )          | 32                                                                                                       | 43                                                 |
| Rmsd bonds (Å)                           | 0.008                                                                                                    | 0.011                                              |
| Rmsd angles (°)                          | 1.1                                                                                                      | 1.4                                                |
| Rmsd bonded Bs (Å <sup>2</sup> )         | 2.2/2.3                                                                                                  | 3.1/3.2                                            |
| Number of TLS groups                     | 10                                                                                                       | 5                                                  |
| Ramachandran analysis (%)                | 90.3/9.0/0.3/0.4                                                                                         | 87.7/11.5/0.4/0.4                                  |

<sup>a</sup>  $R_{\text{sym}} = \sum ||I| - \langle I \rangle| / \sum \langle I \rangle$ , where I is the intensity of a single observation and  $\langle I \rangle$  the average intensity for symmetry equivalent observations.

<sup>b</sup> In parenthesis, for the highest resolution shell.

<sup>c</sup>  $R = \sum |F_o - F_c| / \sum |F_o|$ , where F<sub>o</sub> and F<sub>c</sub> are observed and calculated structure factor amplitudes, respectively. R<sub>FREE</sub> is calculated as R for 1015 reflections (2.6%) sequestered from refinement.

<sup>d</sup> In parenthesis, the number of atoms assigned less than unit occupancy.



A

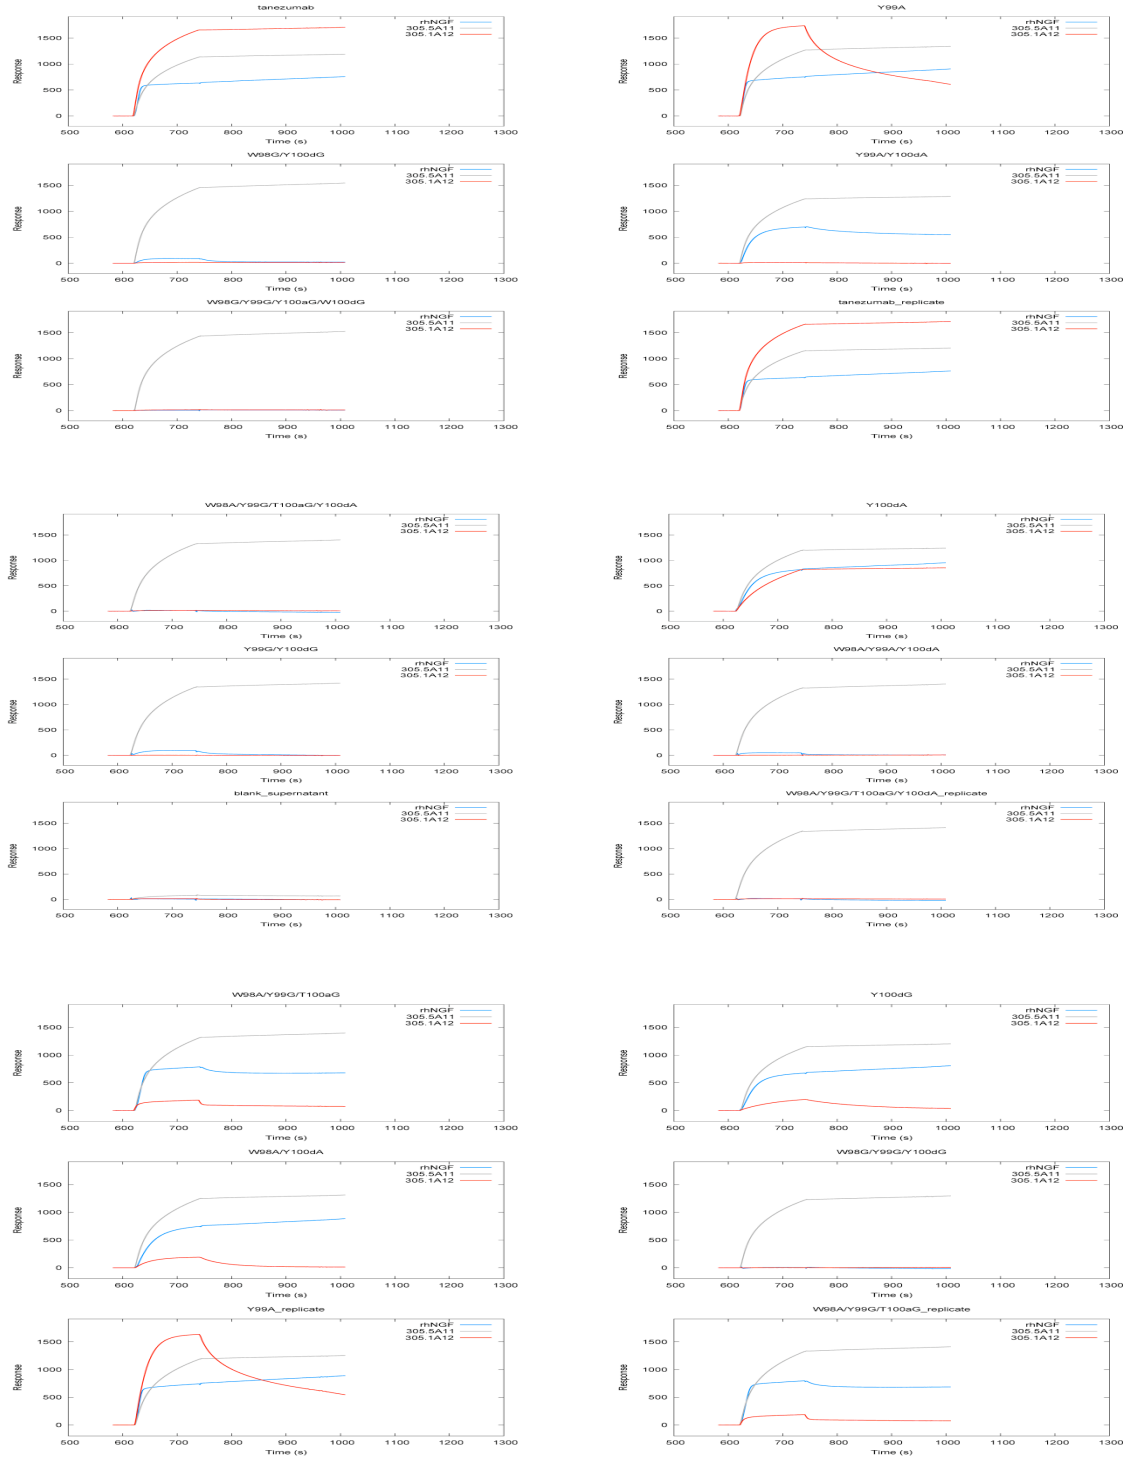

**B**

| Ligand                              | Response (RU) |                        |                    |
|-------------------------------------|---------------|------------------------|--------------------|
|                                     | NGF           | 305.5A11 (Non-Blocker) | 305.1A12 (Blocker) |
| W98A/Y99G/T100aG/Y100dA             | 6             | 1341                   | 14                 |
| W98A/Y99G/T100aG/Y100dA (replicate) | 6             | 1330                   | 14                 |
| W98G/Y99G/Y100dG                    | 7             | 1232                   | 2                  |
| W98G/Y99G/Y100aG/W100dG             | 13            | 1440                   | 16                 |
| W98A/Y99A/Y100dA                    | 21            | 1326                   | 4                  |
| W98G/Y100dG                         | 61            | 1461                   | 17                 |
| Y99G/Y100dG                         | 63            | 1348                   | 1                  |
| tanezumab                           | 649           | 1140                   | 1658               |
| tanezumab                           | 654           | 1155                   | 1665               |
| Y99A/Y100dA                         | 682           | 1243                   | 10                 |
| Y100dG                              | 692           | 1153                   | 177                |
| W98A/Y99G/T100aG                    | 742           | 1323                   | 100                |
| W98A/Y99G/T100aG (replicate)        | 748           | 1337                   | 100                |
| Y99A                                | 761           | 1198                   | 1374               |
| W98A/Y100dA                         | 766           | 1253                   | 143                |
| Y99A (replicate)                    | 770           | 1274                   | 1449               |
| Y100dA                              | 838           | 1201                   | 822                |

**C**

| H3 Mutants              | NGF | 305.5A11(NB) |
|-------------------------|-----|--------------|
| Y99A                    | ++  | ++           |
| W98A/Y99G/T100aG        | +   | ++           |
| W98A/Y99G/T100aG/Y100dA | -   | ++           |
| Y100dA                  | ++  | ++           |
| Y100dG                  | ++  | ++           |
| Y99A/Y100dA             | ++  | ++           |
| Y99G/Y100dG             | +   | ++           |
| W98A/Y100dA             | ++  | ++           |
| W98G/Y100dG             | +   | ++           |
| W98A/Y99A/Y100dA        | +   | ++           |
| W98G/Y99G/Y100dG        | -   | ++           |
| W98G/Y99G/Y100aG/W100dG | -   | ++           |

**Figure S7. Single injection binding characterization by SPR of tanezumab mutants. (a)**

Panel for binding SPR signal by each mutant resulting from the injection of either 200 nM NGF (red), 100 nM non-blocking (NB) antibody 305.5A11 (black) or 100 nM blocking antibody 305.1A12 (blue). **(b)** Table ranking Response of each mutant. **(c)** Table summarizing binding according to mutant name.
